# Supplementary material
Source: PubMed Central journal article supplement (PMC4413761)
Supplement: ASN.2014030233_ASN2014030233SupplementaryData.pdf [file ASN.2014030233_ASN2014030233SupplementaryData.pdf]

# Supplemental Figure 1

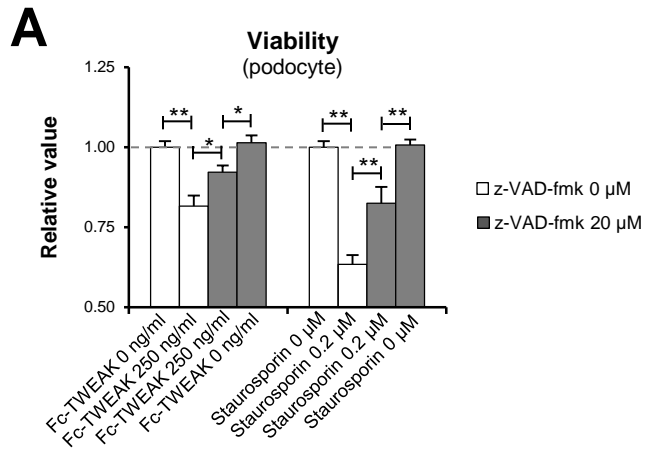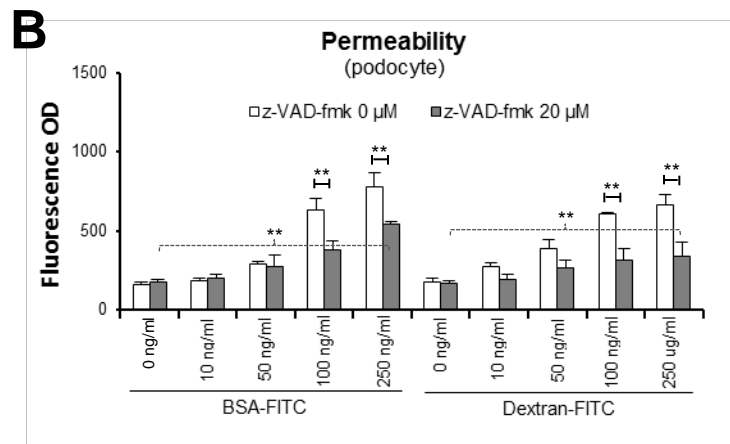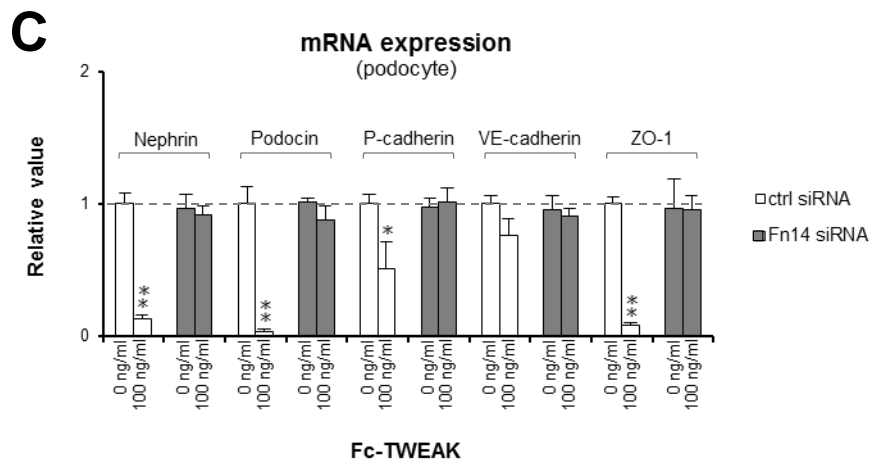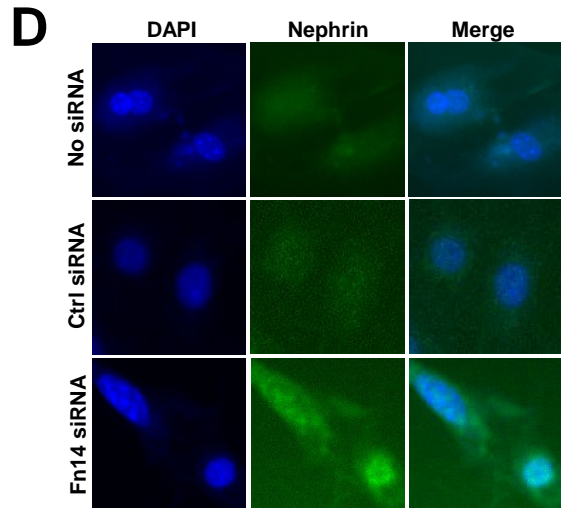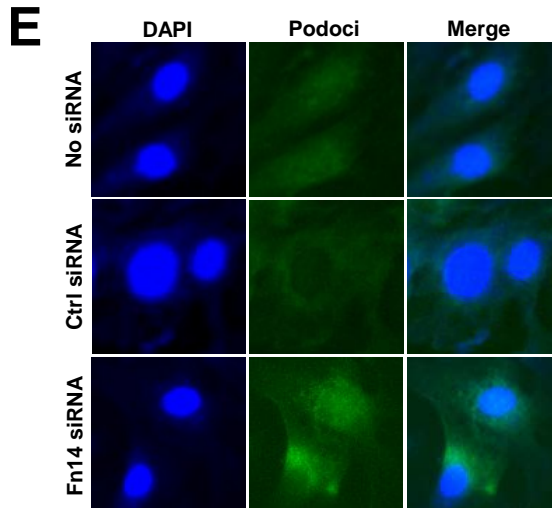

### Supplemental Table 1. Sequences of oligonucleotides

| Oligonucleotide     | Sequence                                                                          |
|---------------------|-----------------------------------------------------------------------------------|
| Fn14 primers        | Forward: 5'-CTAGTTTCCTGGTCTGGAGAAGATG-3'<br>Reverse: 5'-CCCTCTCCACCAGTCTCCTCTA-3' |
| TWEAK primers       | Forward: 5'-CGAGCTATTGCAGCCCATTAT-3'<br>Reverse: 5'-ACCTGCTTGTGCTCCATCCT-3'       |
| Nephrin primers     | Forward: 5'-AGCGTAATCCTCTCCATCCT-3'<br>Reverse: 5'-ACACACAGGTGACCACATATTC-3'      |
| Podocin primers     | Forward: 5'-CGTCTCCAGACCTTGGAAATAC-3'<br>Reverse: 5'-CACATGGGCTAGACTGCTTAG-3'     |
| P-cadherin primers  | Forward: 5'-CGAAAGAGAGAGTGGGTGATG-3'<br>Reverse: 5'-CTTGGTGCCTCTGTCCTTATT-3'      |
| VE-cadherin primers | Forward: 5'-CAGTGACAGAGGCCAATTCT-3'<br>Reverse: 5'-GCCTCCACAGTCAGGTTATAC-3'       |
| ZO-1 primers        | Forward: 5'-CTGATGGTGCTCTGCCTAAT-3'<br>Reverse: 5'-TAGTCGCAAACCCACACTATC-3'       |
| IP-10 primers       | Forward: 5'-GGCCATAGGGAAGCTTGAAA-3'<br>Reverse: 5'-CAGACATCTCTGCTCATCATTCT-3'     |
| MCP-1 primers       | Forward: 5'-CTTCTATGCCTCCTGCTCATAG-3'<br>Reverse: 5'-TTCCGGACGTGAATCTTCTG-3'      |
| IL-3 primers        | Forward: 5'-CTCAATGGGGAAGACCAAGA-3'<br>Reverse: 5'-TCTCAATTGCTGATGCGTTC-3'        |
| Fn14 siRNA          | 5'-UAAACUUUUCUCUCCGGCGGC-3'                                                       |

**Supplemental Table 2. Histological scoring systems**

| Index                           | Subcategories               | Scales                                                                                                                                                                                                                                                                                                                                | Reference                                         |
|---------------------------------|-----------------------------|---------------------------------------------------------------------------------------------------------------------------------------------------------------------------------------------------------------------------------------------------------------------------------------------------------------------------------------|---------------------------------------------------|
| Mesangial proliferation         | Glomerular                  | 0-4 scale (0 = absent, 1 = mild, 2 = mild to moderate, 3 = moderate, 4 = severe) (H&E and PAS staining)                                                                                                                                                                                                                               | <i>Clin Immunol.</i><br>2012;145(2):108-21        |
| Endocapillary hypercellularity  | Glomerular <sup>△</sup>     | 0-4 scale (0 = absent, 1 = present in < 25% , 2 = present in 25–50% , 3 = present in 50–75%, 4 = present in > 75% of the section) (H&E staining)                                                                                                                                                                                      | <i>Clin Immunol.</i><br>2012;145(2):108-21        |
| Crescents                       | Glomerular                  | 0-4 scale (same as <sup>△</sup> ) (H&E staining)                                                                                                                                                                                                                                                                                      | <i>Clin Immunol.</i><br>2012;145(2):108-21        |
| Ki-67                           | Glomerular                  | The number of Ki-67+ cells in 20 glomeruli                                                                                                                                                                                                                                                                                            | /                                                 |
|                                 | Tubular                     | The number of Ki-67+ cells/40× field                                                                                                                                                                                                                                                                                                  |                                                   |
| Caspase-3                       | Tubular                     | 0= no significant positivity (occasional positive lymphocytes)<br>1= rare tubular cell staining                                                                                                                                                                                                                                       | /                                                 |
| Tubular trophy/casts/dilatation | Tubular                     | 0-4 scale (same as <sup>△</sup> ) (trichrome staining)                                                                                                                                                                                                                                                                                | <i>Clin Immunol.</i><br>2012;145(2):108-21        |
| Interstitial fibrosis           | Interstitial                | 0 =< 5%, 1 = 5-10%, 2 = 11-25%, 3 >= 25% (trichrome staining)                                                                                                                                                                                                                                                                         | <i>J Am Soc Nephrol.</i><br>2012;23(7):1229-37    |
| KIM-1/TIM-1                     | Tubular                     | 0 = no significant staining<br>1 = focal staining in proximal tubules (< 10% of tubes)<br>2 = patchy proximal tubular staining (10-50%)<br>3 = diffuse proximal tubular staining (> 50%)                                                                                                                                              | /                                                 |
| Inflammation                    | Cortical (non-perivascular) | 0-4 scale (same as <sup>△</sup> ) (H&E and PAS staining)                                                                                                                                                                                                                                                                              | <i>Clin Immunol.</i><br>2012;145(2):108-21        |
|                                 | Perivascular                | 0-4 scale (same as <sup>△</sup> ) (H&E and PAS staining)                                                                                                                                                                                                                                                                              |                                                   |
| B220                            | Glomerular                  | 0= no significant B220+ cells<br>1= multifocally up to 1-2 B220+ cells/glomerulus<br>2= multifocally up to 3-4 B220+ cells/glomerulus<br>3= multifocally > 4 B220+ cells in some glomeruli                                                                                                                                            | /                                                 |
|                                 | Perivascular                | 0 = no significant staining<br>1 = patchy mild B220+ cells partially surrounding at least 1 artery<br>2 = small cuffs of B220+ cells surrounding multiple arteries<br>3 = expansile cuffs of B220+ cells surrounding multiple arteries                                                                                                |                                                   |
|                                 | Interstitial                | 0 = <5/600x field on average<br>1 = Scattered B220 cells in the interstitium (on average 5-15 per 600× field )<br>2 = Scattered B220+ cells in the interstitium (on average 15-30 per 600× field)<br>3 = Scattered B220+ cells in the interstitium (on average > 30 per 600× field)                                                   |                                                   |
| CD3                             | Glomerular                  | 0= no significant CD3+ cellular infiltration<br>1= multifocally up to 1-2 CD3+ cells per glomerulus<br>2= multifocally up to 3-4 CD3+ cells per glomerulus<br>3= multifocally > 4 CD3+ cells per glomerulus                                                                                                                           | /                                                 |
|                                 | Perivascular                | 0 = no significant staining<br>1 = patchy mild CD3 cells partially surrounding at least 1 artery<br>2 = small cuffs of CD3 cells surrounding multiple arteries<br>3 = expansile cuffs of CD3 cells surrounding multiple arteries                                                                                                      |                                                   |
|                                 | Interstitial                | 0 = no significant staining<br>1 = Scattered CD3 cells in the interstitium (on average < 15 per 600× field )<br>2 = Scattered CD3 cells in the interstitium (on average 15-30 per 600× field)<br>3 = Scattered CD3 cells in the interstitium (on average > 30 per 600× field)                                                         |                                                   |
| F4/80                           | Glomerular                  | 0 = none or on average < 1 F4/80+ cell/glomerulus<br>1 = average 1-2 F4/80+ cells/glomerulus<br>2 = average 3-5 F4/80+ cells/glomerulus<br>3 = average > 5 F4/80+ cells/glomerulus                                                                                                                                                    | /                                                 |
|                                 | Perivascular                | 0 = no significant staining<br>1 = patchy mild F4/80+ cells partially surrounding at least 1 artery<br>2 = small cuffs of F4/80+ cells surrounding multiple arteries<br>3 = expansile cuffs of F4/80+ cells surrounding multiple arteries                                                                                             |                                                   |
|                                 | Interstitial                | 0 = none or on average < 1 F4/80+ cell in the interstitium per 600× field<br>1 = Scattered F4/80+ cells in the interstitium (on average 1 < 10 per 600× field)<br>2 = Scattered F4/80+ cells in the interstitium (on average 10-20 per 600× field)<br>3 = Scattered F4/80+ cells in the interstitium (on average > 20 per 600× field) |                                                   |
| Immune complex deposition       | Glomerular                  | 0 = no deposits visible by light microscopy<br>1 = segmental mesangial & glomerular capillary wall (GCW)<br>2 = global mild-moderate mesangial & segmental-global GCW<br>3 = prominent expansion of mesangium & global GCW deposits (trichrome/PAS staining)                                                                          | <i>J Am Soc Nephrol.</i><br>2012;23(7):1229-37    |
| WT1                             | Glomerular                  | Average number of WT1+ cells per glomeruli (counting 10 glomeruli per section) (IHC)                                                                                                                                                                                                                                                  | <i>J Histochem Cytochem.</i><br>2009;57(7):623-31 |
